# Supplementary figures and images for: Umbellaceae fam. nov. (Hymenochaetales, Basidiomycota) for Umbellus sinensis gen. et sp. nov. and Three New Combinations
Source: MDPI journal article supplement (doi:10.3390/jof10010022), 2023-12-28

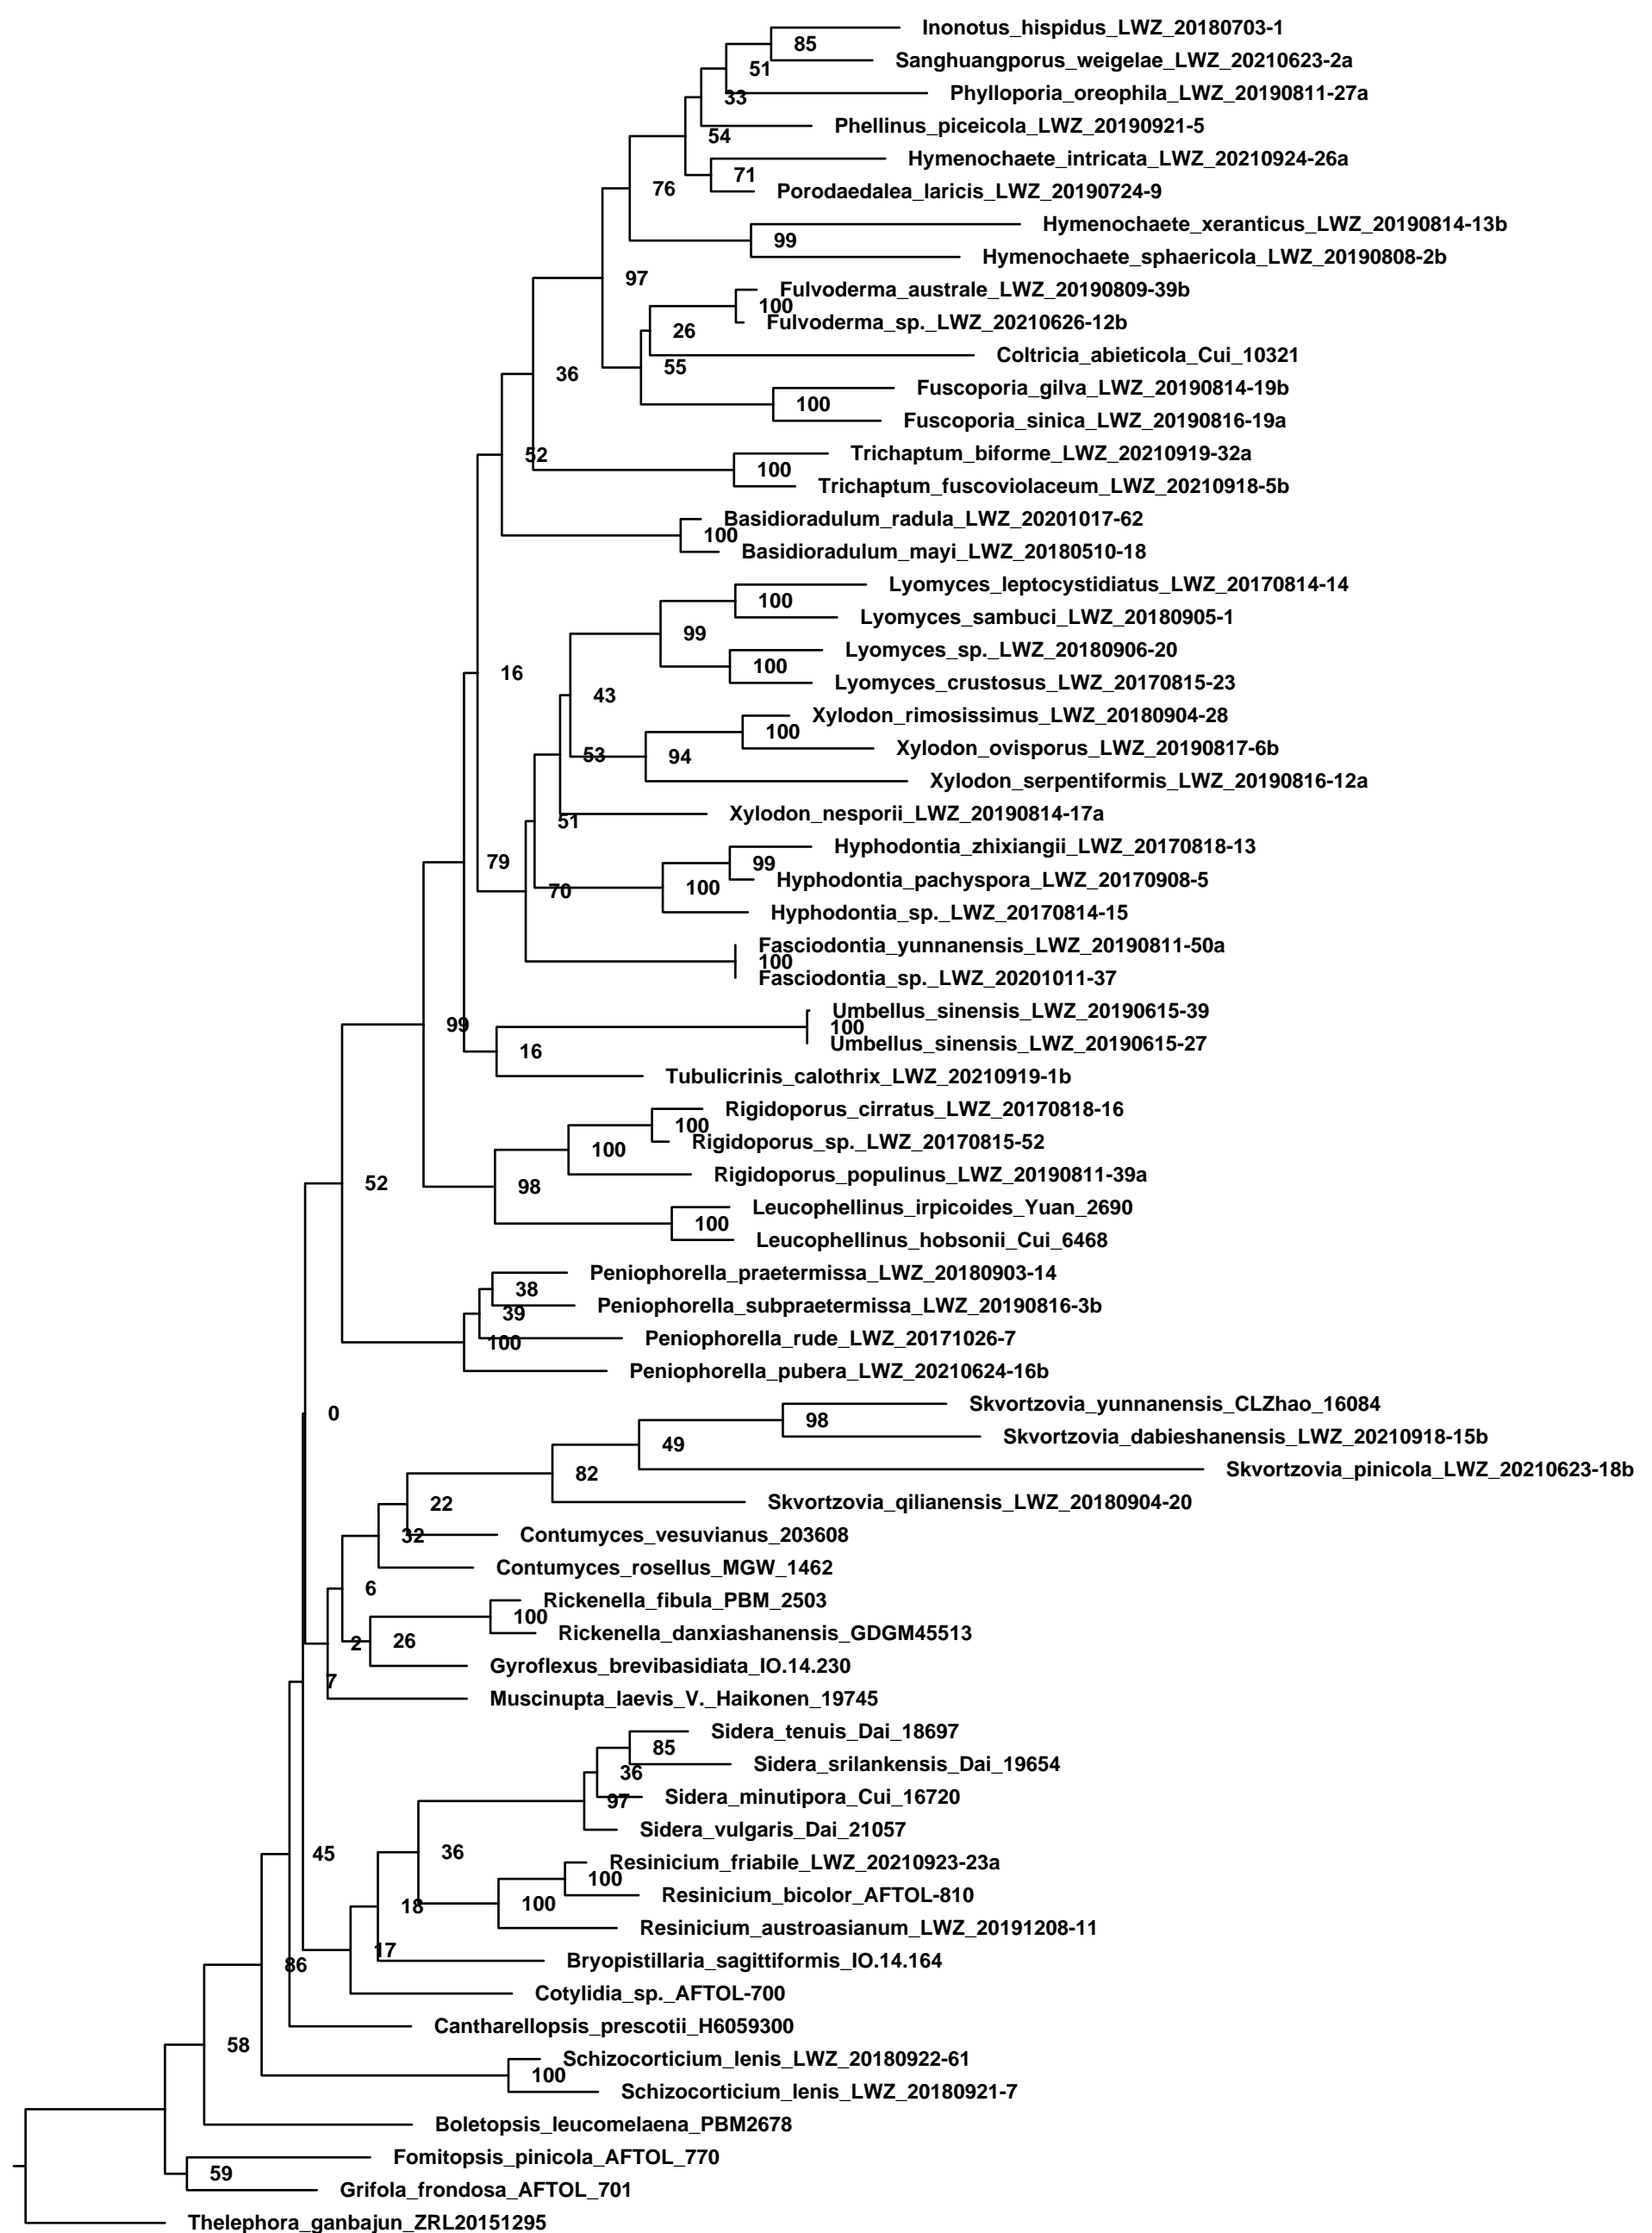

0.3

Supplement: s1 [file s1]

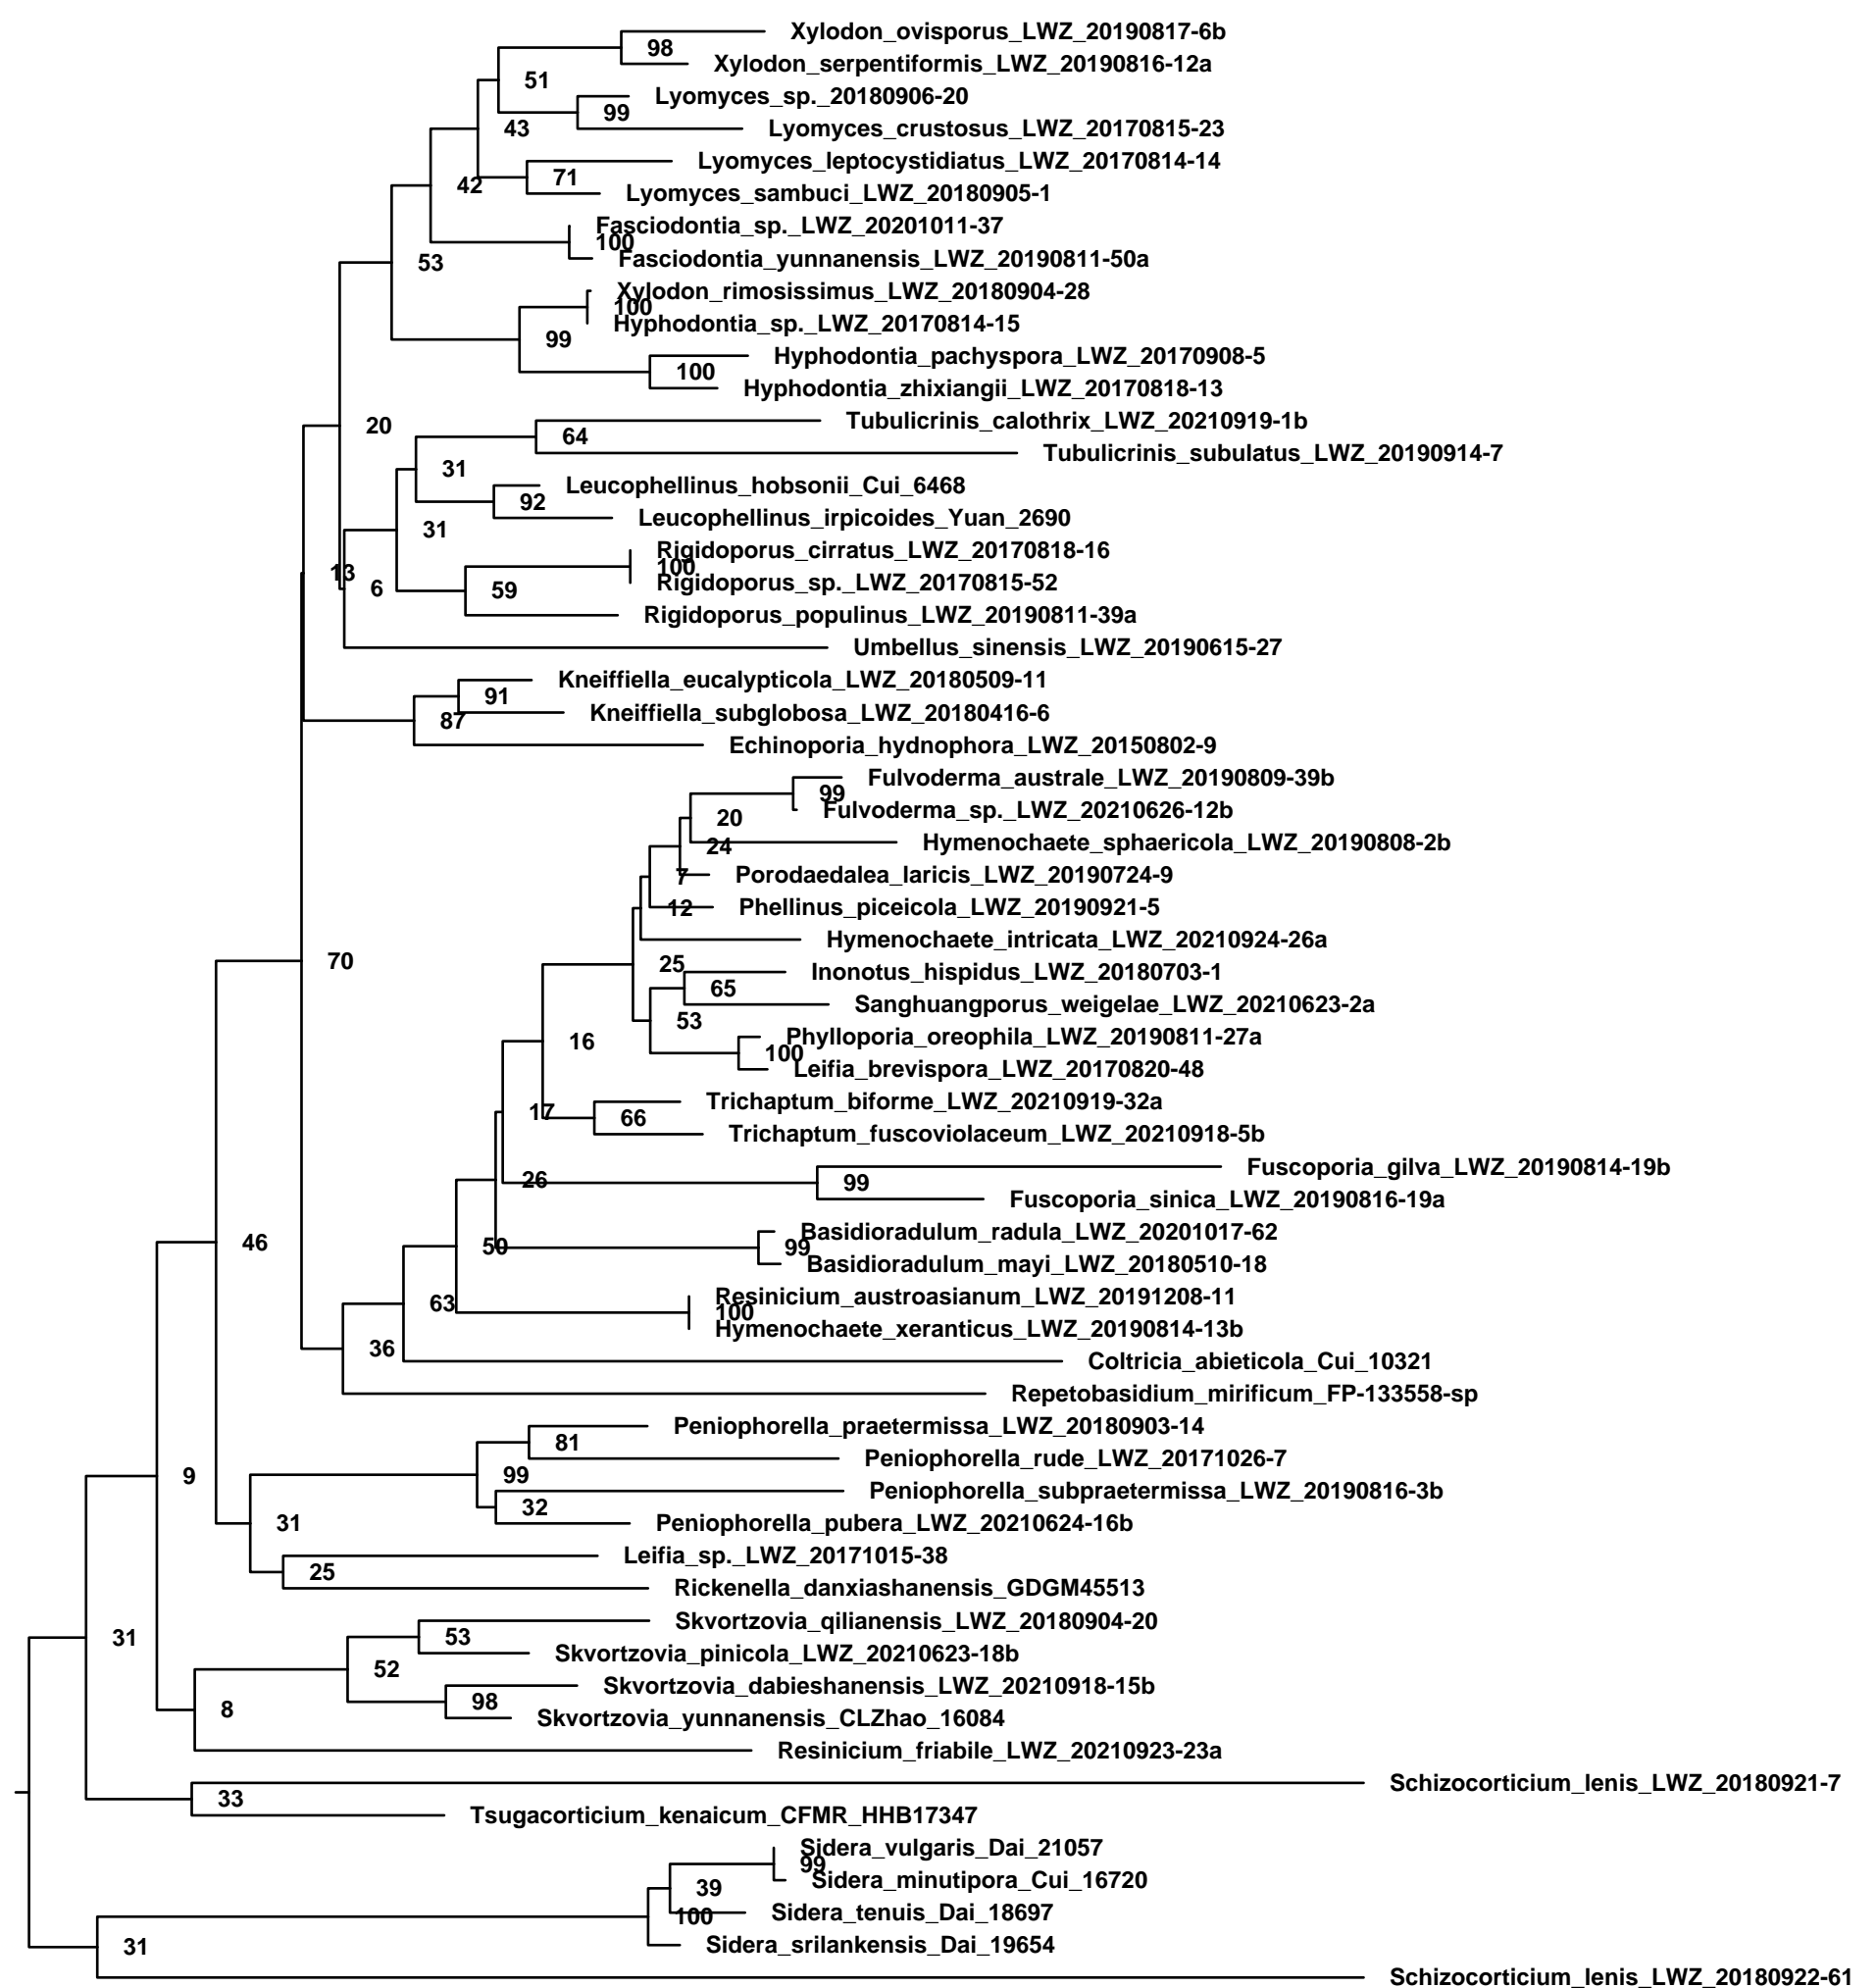

0.2

Supplement: s1 [file s1]

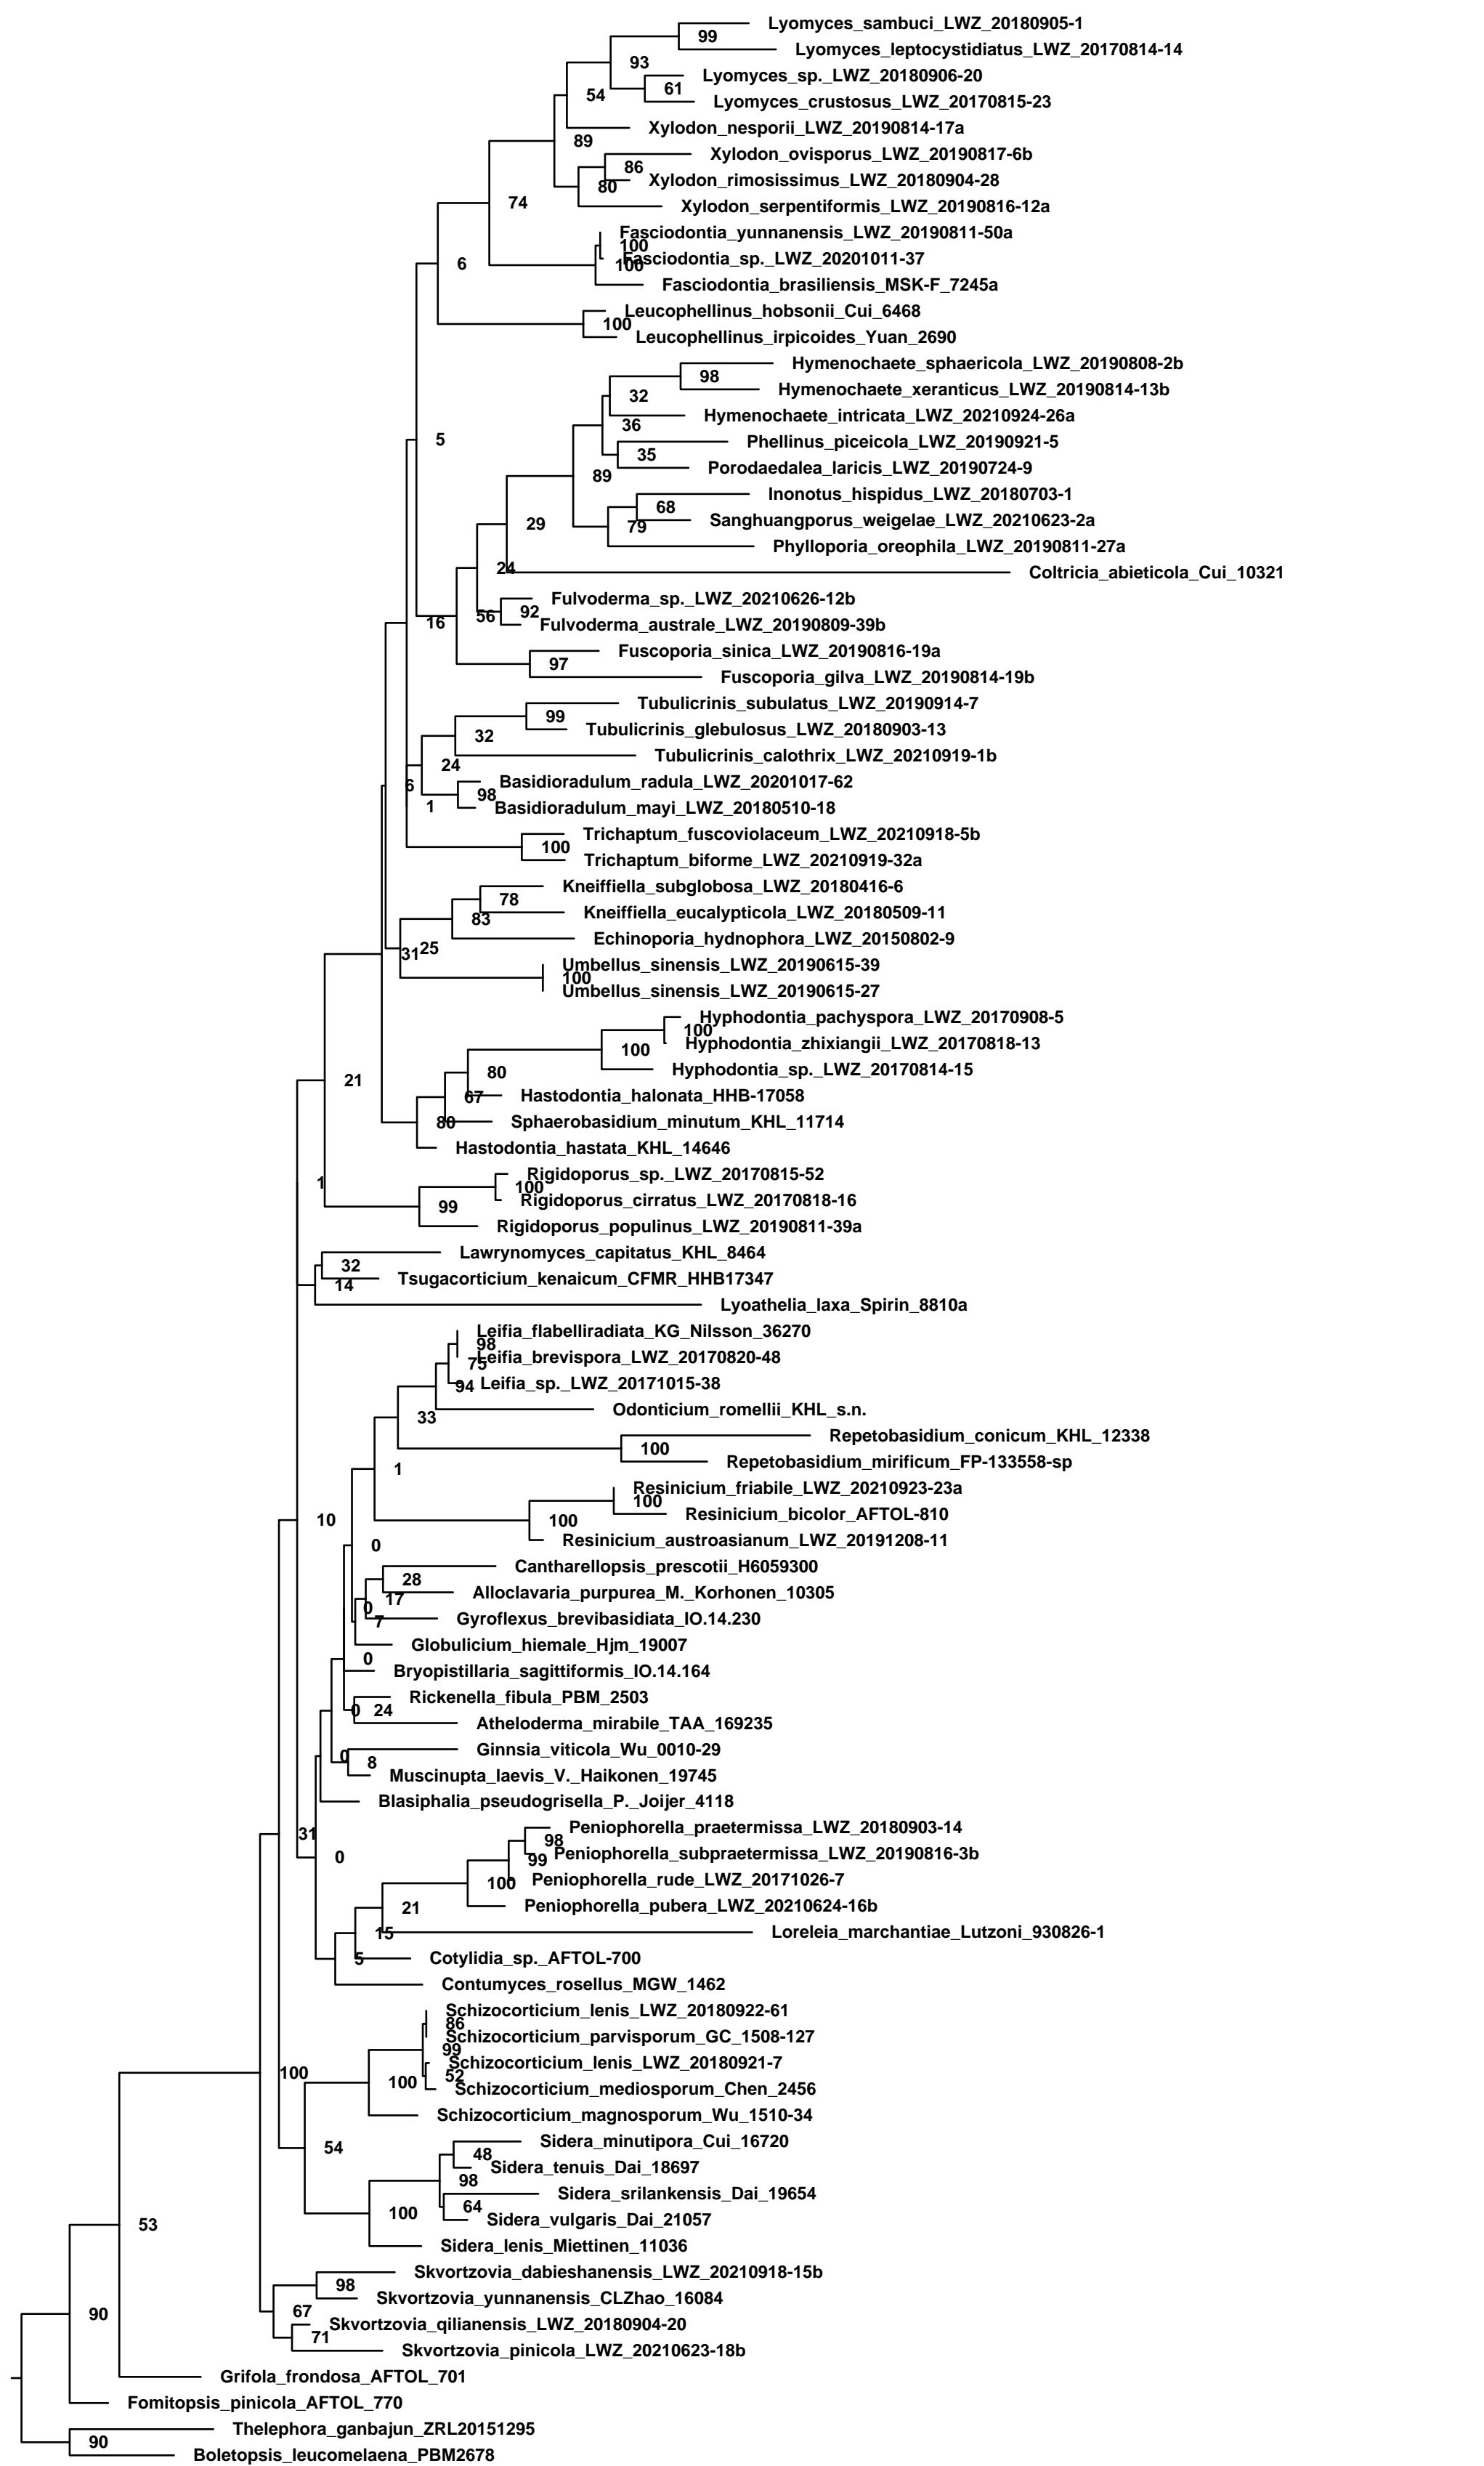

0.05

Supplement: s1 [file s1]

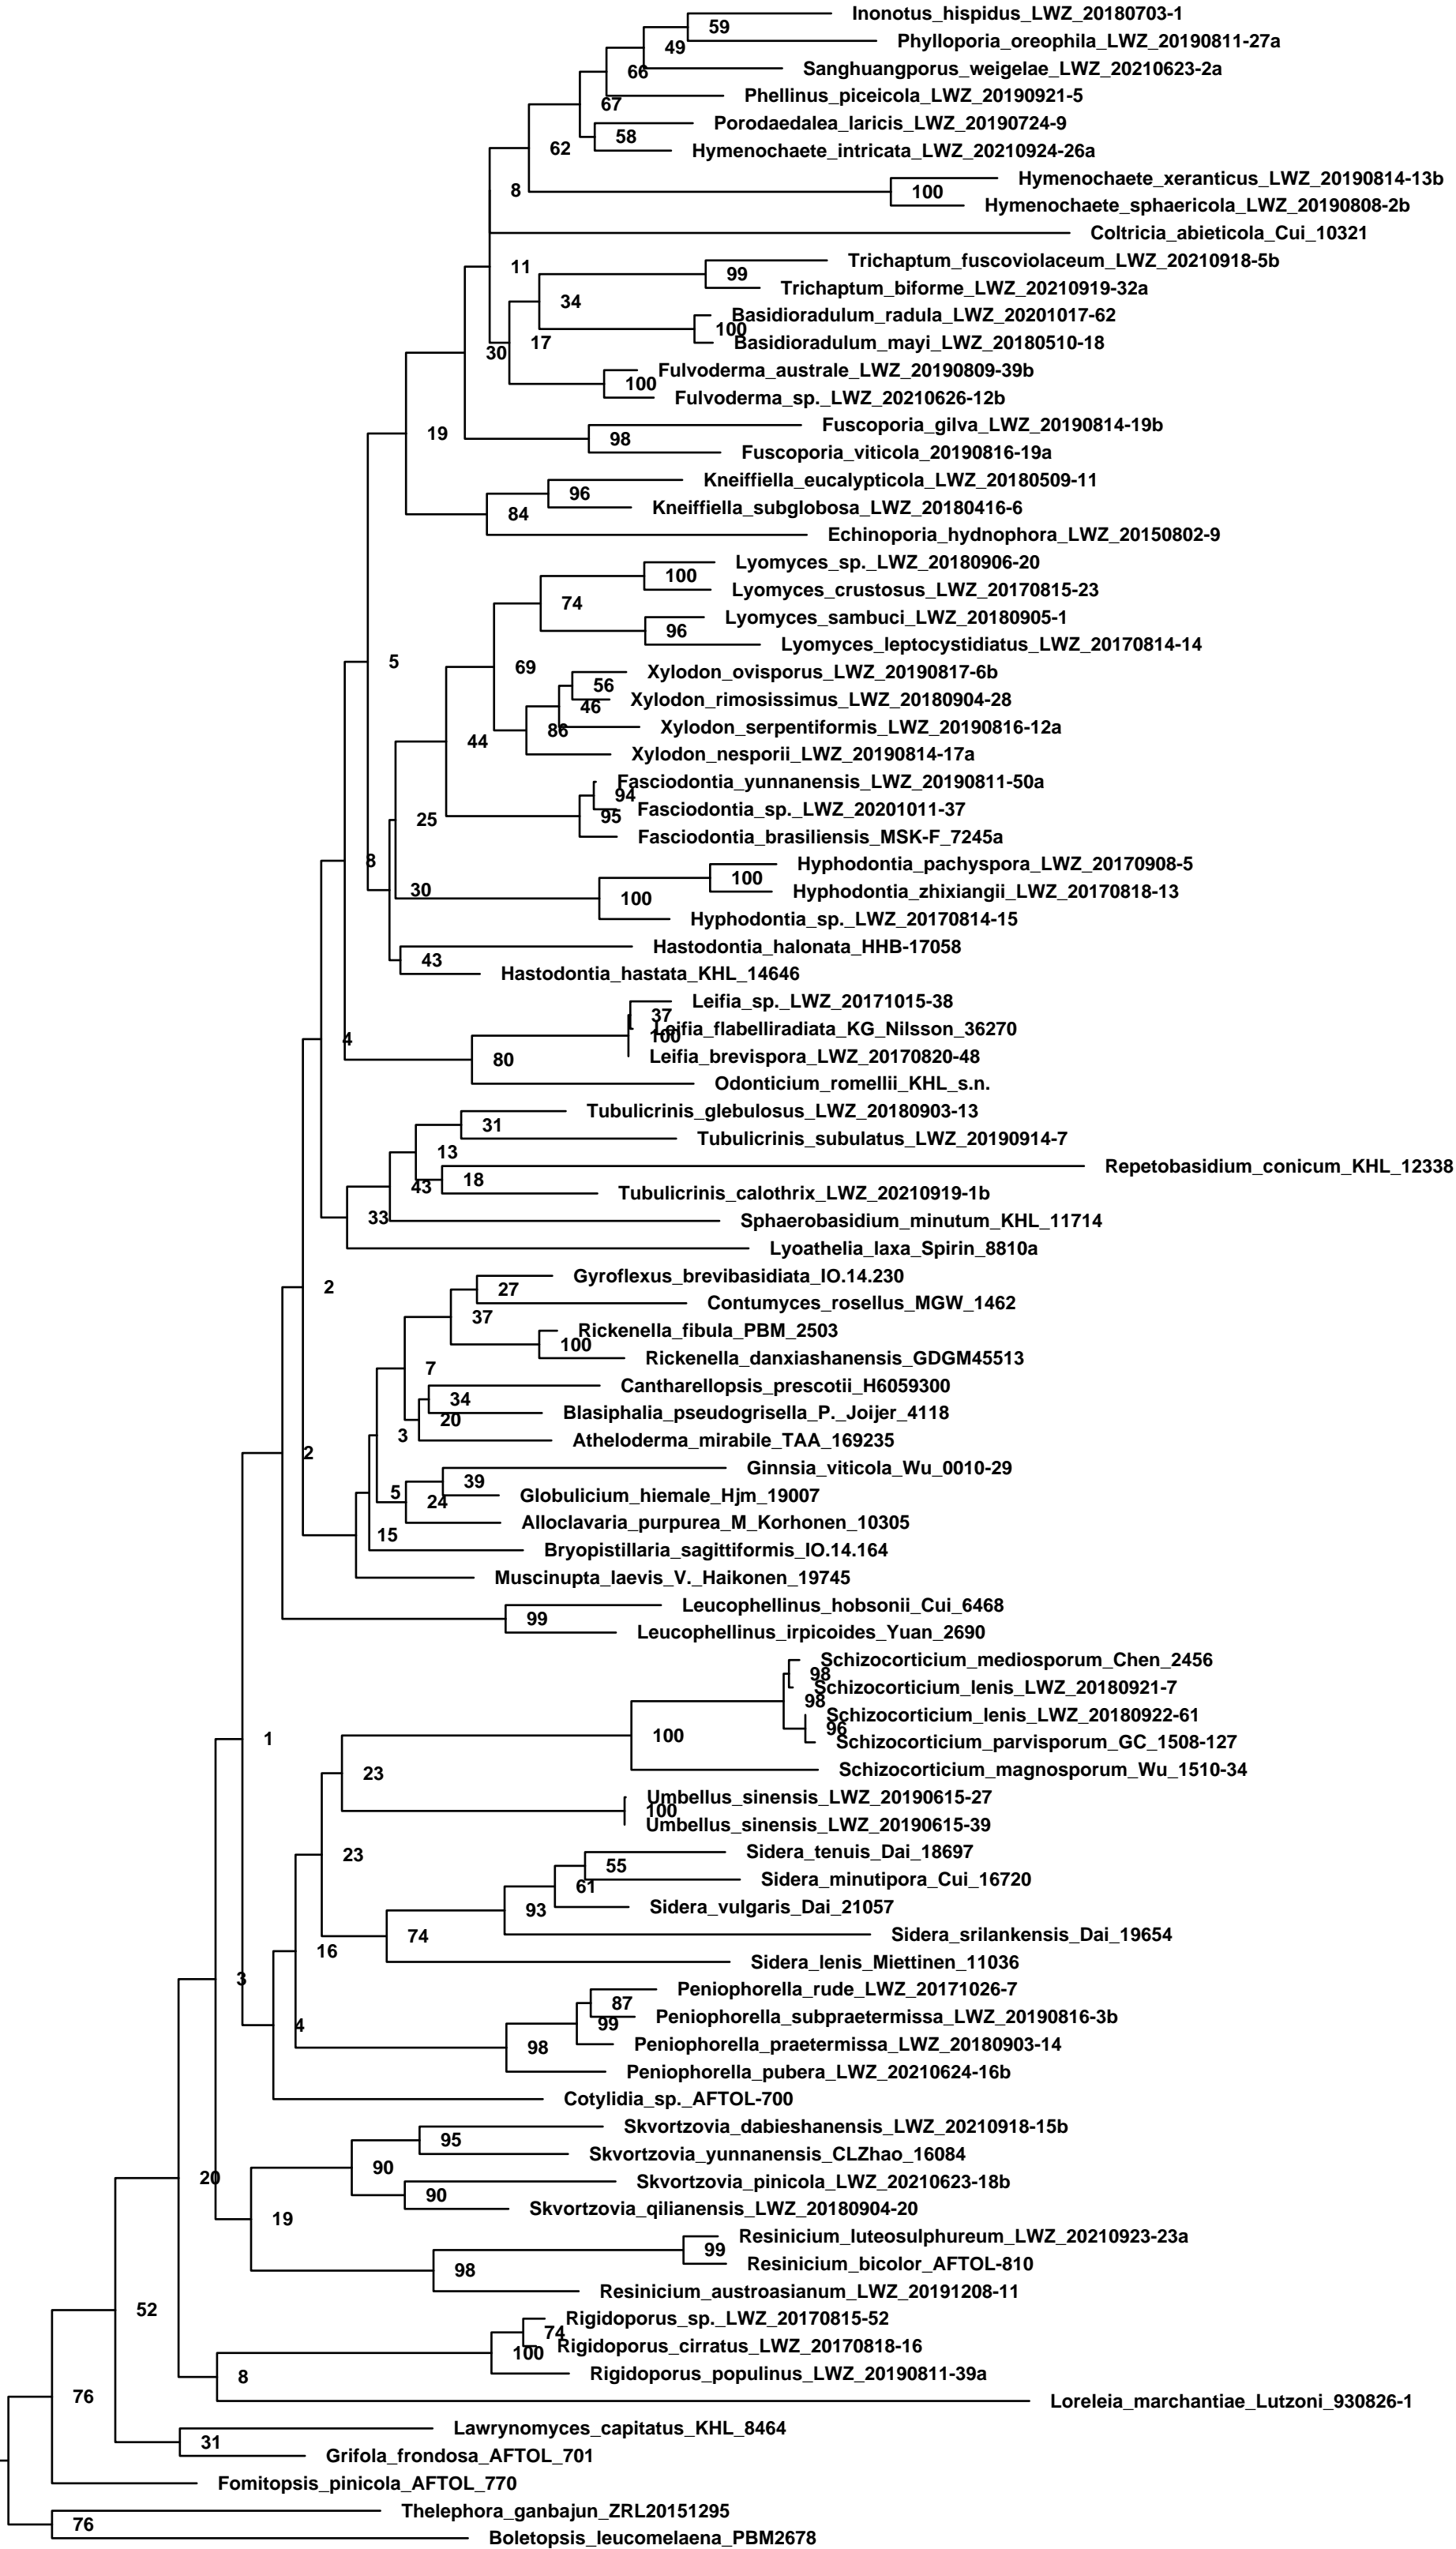

Supplement: s1 [file s1]

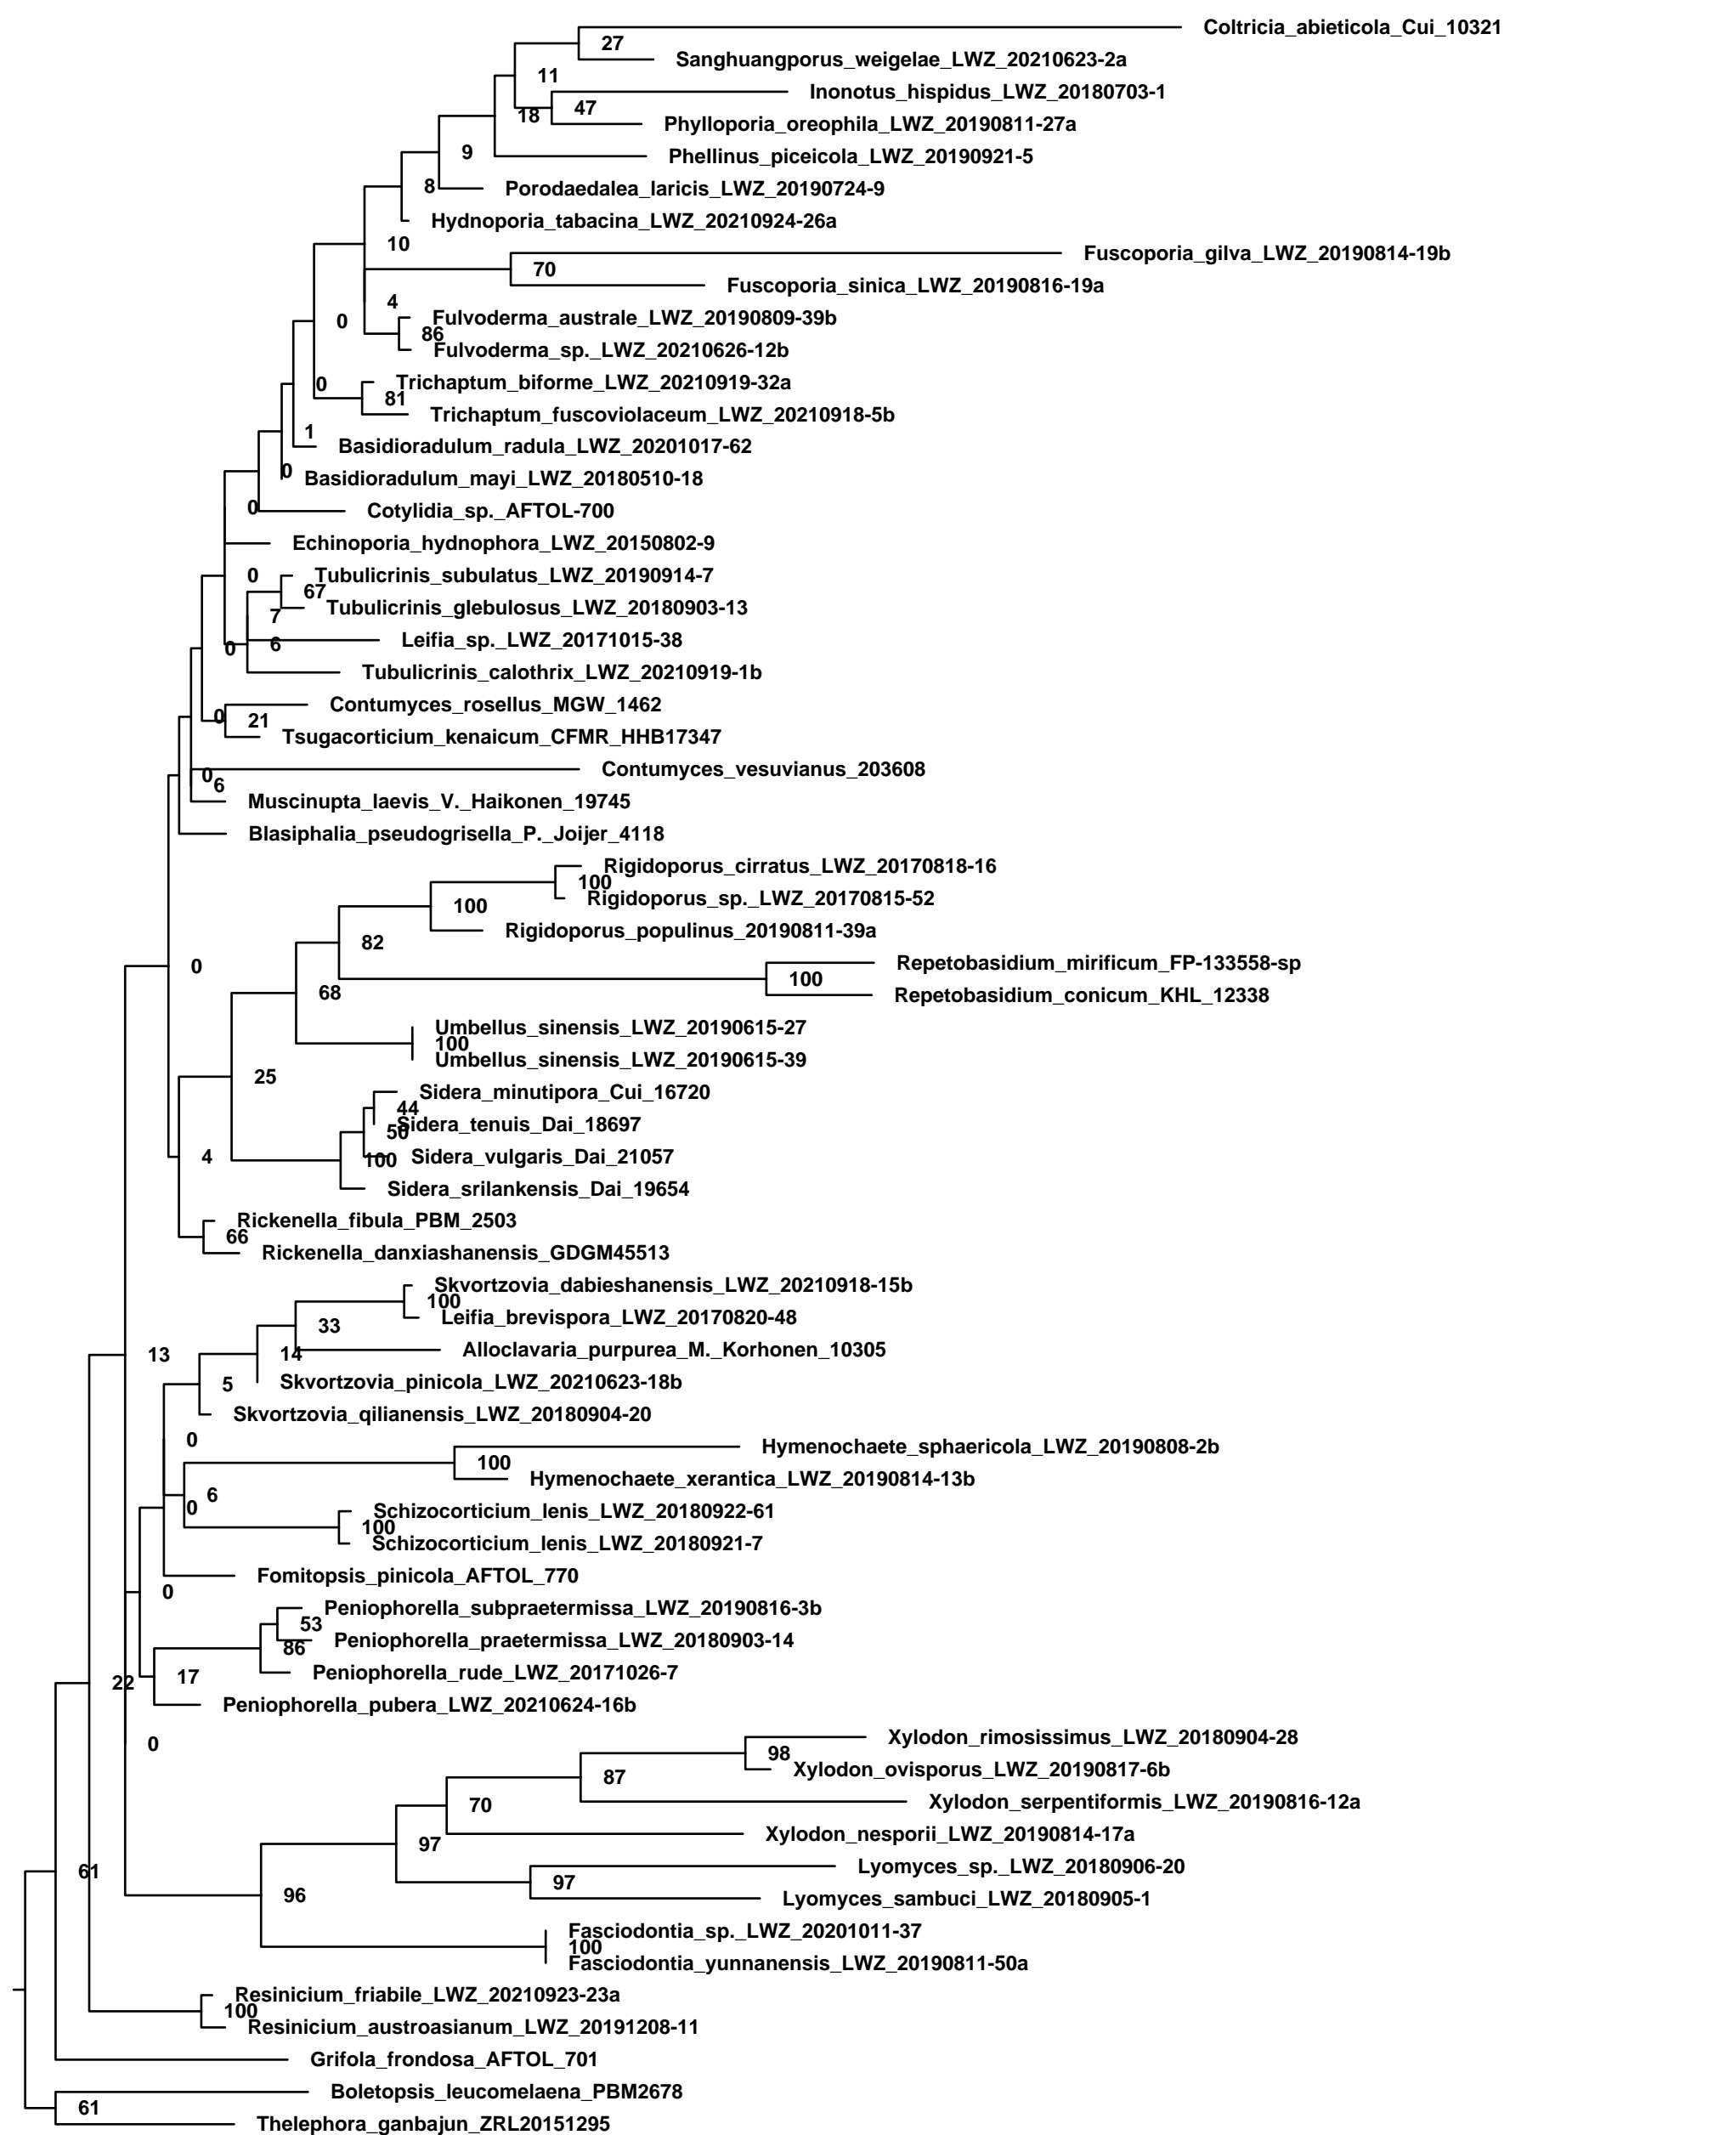

0.02

Supplement: s1 [file s1]
